# Supplementary material
Source: HighWire-hosted journal article supplement (https://ard.bmj.com/content/77/11/1694)
Supplement: inline-supplementary-material-1 [file inline-supplementary-material-1.docx]

**Antiphospholipid Antibodies detection**

The Antiphospholipid Antibodies (aPL) profile included Lupus Anticoagulant (LA), anticardiolipin (aCL), and anti- ß2 Glycoprotein I antibodies (anti-ß2GPI). The aCL and anti-ß2GPI (IgG and IgM) were detected by commercial ELISA assay by INOVA Diagnostics, Inc., San Diego, CA, United States.

Plasma samples were tested for the presence of LA according to the recommended criteria from the International Society on Thrombosis and Haemostasis (ISTH) Subcommittee on Lupus Anticoagulant/Phospholipid-Dependent Antibodies [1,2].

**References**

1 Brandt JT, Triplett DA, Alving B, *et al.* Criteria for the diagnosis of lupus anticoagulants: an update. On behalf of the Subcommittee on Lupus Anticoagulant/Antiphospholipid Antibody of the Scientific and Standardisation Committee of the ISTH. *Thromb Haemost* 1995;**74**:1185–90.http://www.ncbi.nlm.nih.gov/pubmed/8560433 (accessed 22 Dec 2016).

2 PENGO V, TRIPODI A, REBER G, *et al.* Update of the guidelines for lupus anticoagulant detection. *J Thromb Haemost* 2009;**7**:1737–40. doi:10.1111/j.1538-7836.2009.03555.x
